# Supplementary material for: Transgenic LRRK2 R 1441 G rats–a model for Parkinson disease?
Source: PeerJ journal article supplement (doi:10.7717/peerj.945), 2015-05-12

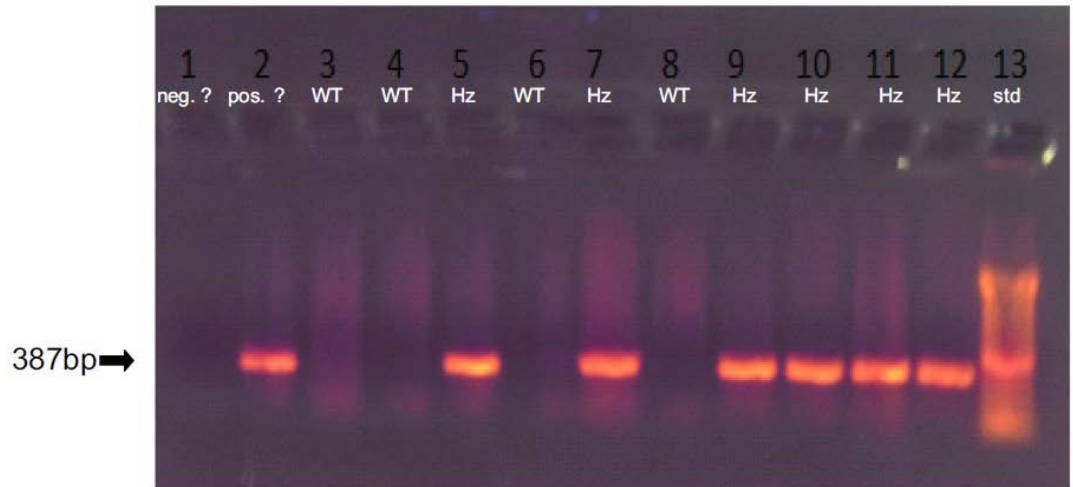

Supplement: supplement.pdf [file supplement.pdf]
